# Supplementary material for: TCO-free conducting polymers/carbon cloths as the flexible electro-catalytic counter electrodes for dye-sensitized solar cells
Source: Royal Society of Chemistry journal article supplement (doi:10.1039/c5ta06382e), 2015-01-01
Supplement: c5ta06382e1.pdf [file c5ta06382e1.pdf]

## Electronic Supplementary Information

### TCO-free conducting polymers/carbon clothes as the flexible electro-catalytic counter electrodes for dye-sensitized solar cells

Chun-Ting Li,<sup>a</sup> Yi-Feng Lin,<sup>b</sup> I-Ting Chiu,<sup>a</sup> and Kuo-Chuan Ho

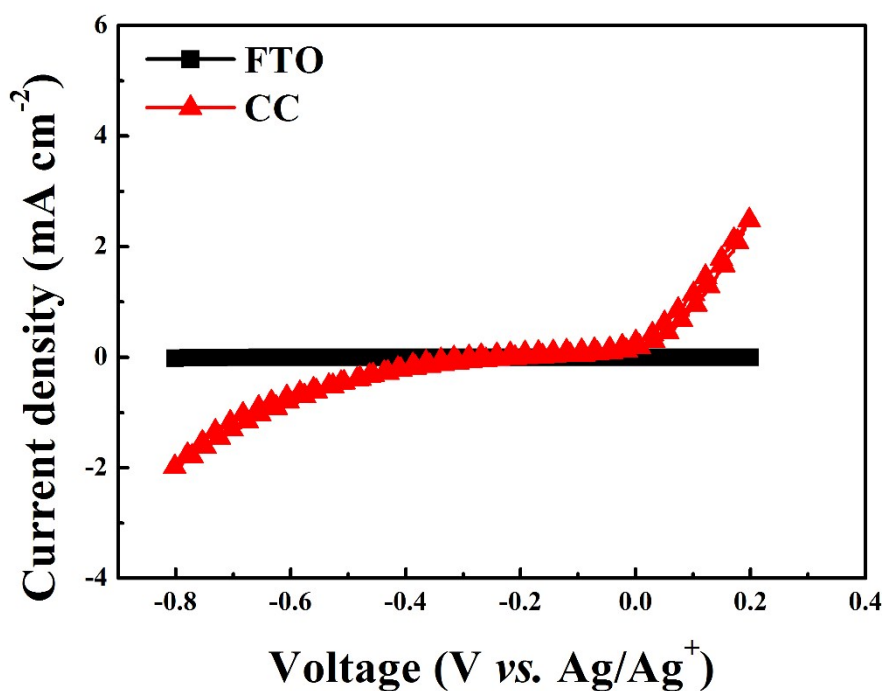

**Figure S1.** Cyclic voltammograms of bare fluorine-doped tin oxide glass (FTO) and carbon cloth (CC) substrates. The electrolyte contained 10.0 mM LiI, 1.0 mM I<sub>2</sub>, and 0.1 M LiClO<sub>4</sub> in ACN. A scan rate of 100 mV s<sup>-1</sup> was used.
